# Supplementary material for: Low Dielectric Properties and Transmission Loss of Polyimide/Organically Modified Hollow Silica Nanofiber Composites
Source: MDPI journal article supplement (doi:10.3390/polym14204462), 2022-10-21
Supplement: s1 [file s1]

## Supplementary data

Table S1: Contact angle and water absorption of polyimide/m-HSNF composites.

| Sample                   | Contact angle | Water absorption |
|--------------------------|---------------|------------------|
|                          | (degree)      | (%)              |
| BPDA-BAPP                | 68.3          | 0.97             |
| 1 wt% BPDA-BAPP/m-HSNF   | 71.8          | 0.96             |
| 3 wt% BPDA-BAPP/m-HSNF   | 73.3          | 0.96             |
| 5 wt% BPDA-BAPP/m-HSNF   | 74.2          | 0.96             |
| BPDA-HFBAPP              | 73.7          | 0.74             |
| 1 wt% BPDA-HFBAPP/m-HSNF | 74.8          | 0.74             |
| 3 wt% BPDA-HFBAPP/m-HSNF | 77.5          | 0.73             |
| 5 wt% BPDA-HFBAPP/m-HSNF | 79.9          | 0.72             |
